# Supplementary material for: Renal tubular injury induced by glyphosate combined with hard water: the role of cytosolic phospholipase A2
Source: PubMed Central journal article supplement — Ann Transl Med. 2021 Jan;9(2):130. doi: 10.21037/atm-20-7739 (PMC7867956; doi:10.21037/atm-20-7739), 2021-01
Supplement: atm-09-02-130-dss.pdf [file atm-09-02-130-dss.pdf]

## Data Sharing Statement

|                     |                                                                                                                                                     |                                                                                                      |
|---------------------|-----------------------------------------------------------------------------------------------------------------------------------------------------|------------------------------------------------------------------------------------------------------|
| <b>Article Info</b> | <a href="http://dx.doi.org/10.21037/atm-20-7739">http://dx.doi.org/10.21037/atm-20-7739</a>                                                         |                                                                                                      |
| <b>Item</b>         | <b>Question</b>                                                                                                                                     | <b>Authors' Response<br/>(place "-" if not applicable)</b>                                           |
| 1                   | Would you like to share data collected for your study to others?                                                                                    | The data during the current study are available from the corresponding author on reasonable request. |
| 2                   | If not, would you like to share the reason for your decision?                                                                                       | -                                                                                                    |
| 3                   | What data in particular will be shared?                                                                                                             | All test index values, analysis results and pathological pictures.                                   |
| 4                   | Any other documents will be shared? Such as study protocol, statistical analysis plan, informed consent form, clinical study report, analytic code. | Yes, contact the corresponding author by email.                                                      |
| 5                   | When will data availability begin?                                                                                                                  | After the manuscript published.                                                                      |
| 6                   | When will data availability end?                                                                                                                    | Two years.                                                                                           |
| 7                   | To whom will you share the data?                                                                                                                    | Reader and researcher.                                                                               |
| 8                   | For what type of analysis or purpose?                                                                                                               | Related subject research.                                                                            |
| 9                   | How or where can the data/documents be obtained?                                                                                                    | Request by email.                                                                                    |
| 10                  | Any other restrictions?                                                                                                                             | -                                                                                                    |
